# Supplementary material for: MicroRNA-34a suppresses the invasion and migration of colorectal cancer cells by enhancing EGR1 and inhibiting vimentin
Source: PubMed Central journal article supplement — Exp Ther Med. 2019 Jul 30;18(4):2459–66. doi: 10.3892/etm.2019.7826 (PMC6755272; doi:10.3892/etm.2019.7826), 2019-07-30
Supplement: Supplementary_Data.pdf [file Supplementary_Data.pdf]

Table SI. Detailed information on cell lines.

| Cell line | Organism | Tissue                                                            | Disease                                             |
|-----------|----------|-------------------------------------------------------------------|-----------------------------------------------------|
| NCM460    | Human    | Colon                                                             | Normal                                              |
| RKO       | Human    | Colon                                                             | Carcinoma                                           |
| LoVo      | Human    | Colon; derived from metastatic site (left supraclavicular region) | Dukes' type C, grade IV, colorectal adenocarcinoma  |
| Caco-2    | Human    | Colon                                                             | Colorectal adenocarcinoma                           |
| SW1116    | Human    | Colon                                                             | Dukes' type A, grade III, colorectal adenocarcinoma |
| SW480     | Human    | Colon                                                             | Dukes' type B, colorectal adenocarcinoma            |
| SW620     | Human    | Colon; derived from metastatic site (lymph node)                  | Dukes' type C, colorectal adenocarcinoma            |

Data are adapted from the American Type Culture Collection.
